# Supplementary material for: Lightweight, elastic and conductive pure PEDOT:PSS foam for dual-mode sensing
Source: Royal Society of Chemistry journal article supplement (doi:10.1039/d4ta01631a), 2024-01-01
Supplement: d4ta01631a1.pdf [file d4ta01631a1.pdf]

# Supping Information

## **Lightweight, Elastic and Conductive Pure PEDOT:PSS**

### **Foam for Dual-Mode Sensing**

Haibin Li<sup>a</sup>, Rubai Luo<sup>b,c\*</sup>, Jingbo Hu<sup>b</sup>, Shisheng Zhou<sup>b,c</sup>, Xing Zhou<sup>b</sup>, and Bin Du<sup>b,c</sup>

<sup>a</sup>School of Mechanical and Precision Instrument Engineering, Xi'an University of Technology, Xi'an 710048, China

<sup>b</sup>Faculty of Printing, Packaging Engineering and Digital Media Technology, Xi'an University of Technology, Xi'an 710048, China

<sup>c</sup>Shaanxi Provincial Key Laboratory of printing and Packaging Engineering, Xi'an University of Technology, Xi'an 710048, China

\*Corresponding author:

E-mail: luorubai@xaut.edu.cn

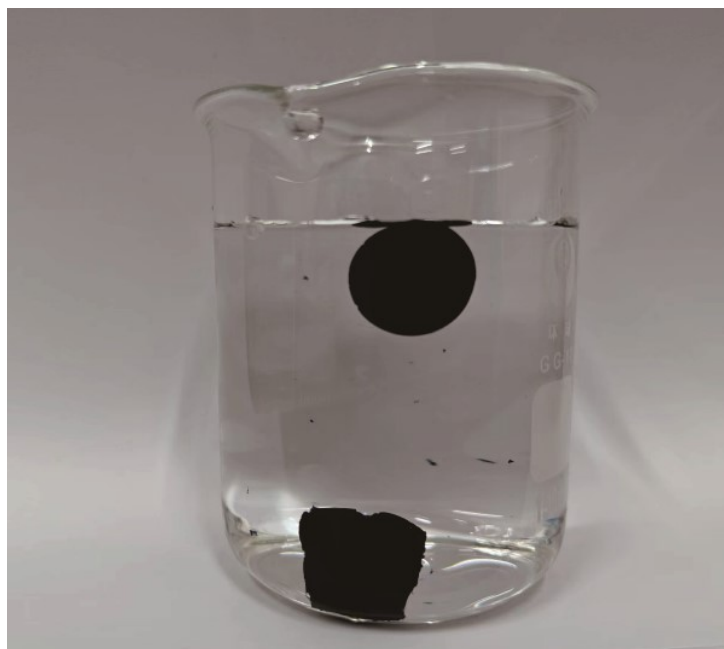

**Fig. S1.** The state of foam and non-foam PEDOT:PSS hydrogels in water.

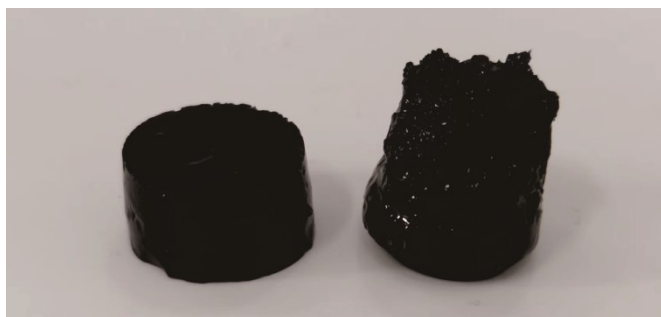

**Fig. S2.** Normal foamed PEDOT:PSS hydrogel (left) and over-foamed PEDOT:PSS hydrogel (right).

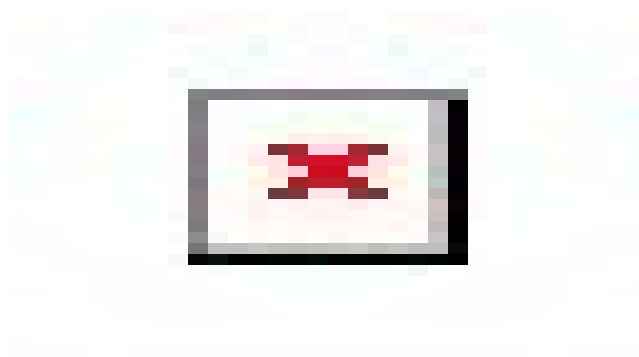

**Fig.S3.** SBLPP foam on the setose asparagus.

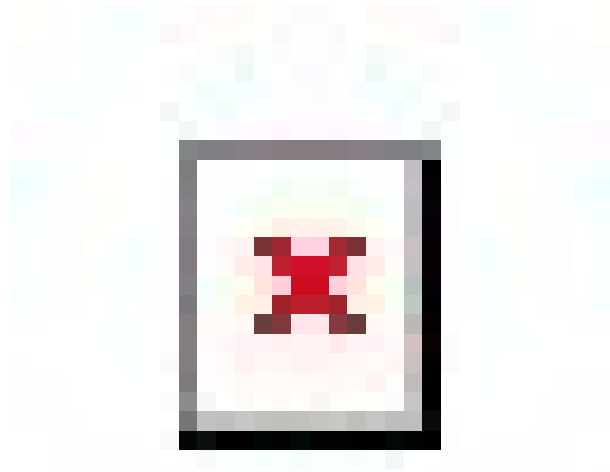

**Fig.S4.** Photograph of (a) SBPP foam, (b) BLPP foam, (c) SLPP foam, (d) SBLPP foam.

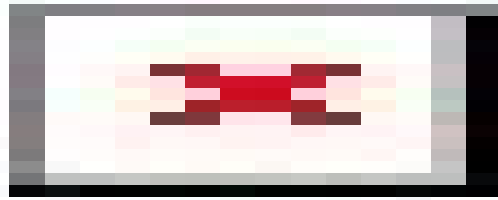

**Fig. S5.** SEM images of the axial cross-sections of (a) SLPP foam and (b) SBLPP foam.

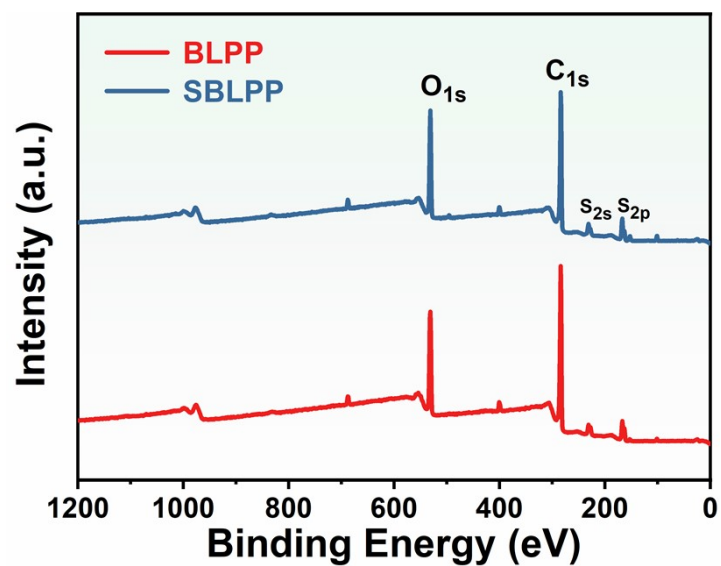

**Fig. S6.** XPS spectra of BLPP and SBLPP foams.

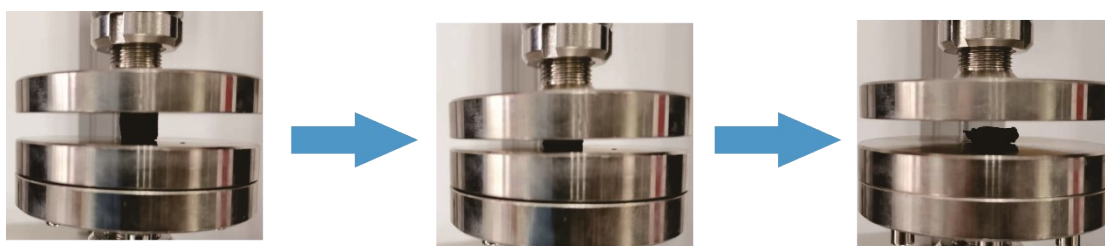

**Fig. S7.** Photographs of the loading-unloading process of the SBPP foam

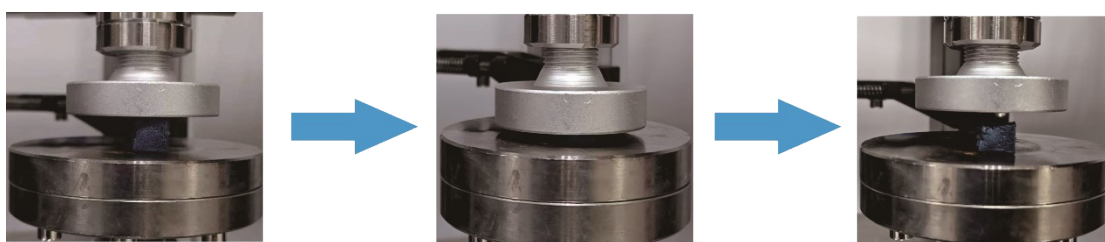

**Fig. S8.** Photographs of the loading-unloading process of the BLPP foam

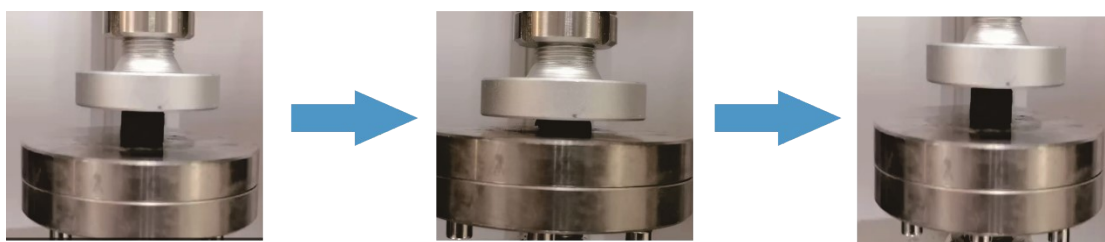

**Fig. S9.** Photographs of the loading-unloading process of the SBLPP foam

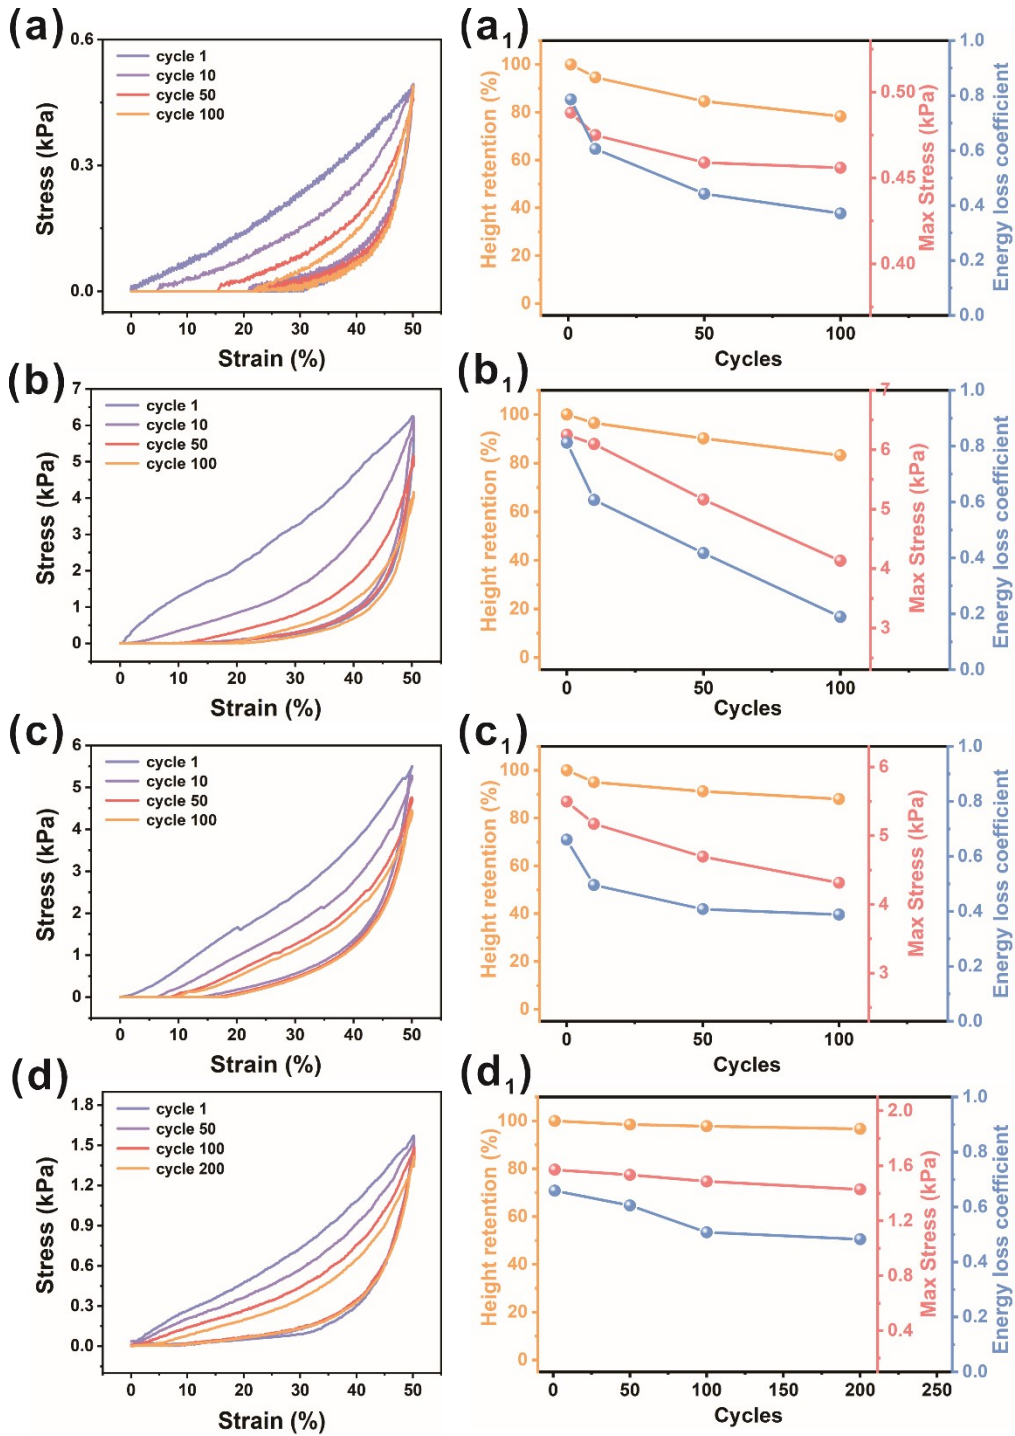

**Fig. S10.** Cyclic compressive stress-strain curves, height retention, maximum stress and energy loss coefficient of (a, a<sub>1</sub>) SBPP foam, (b, b<sub>1</sub>) BLPP foam, (c, c<sub>1</sub>) SLPP foam, (d, d<sub>1</sub>) SBLPP foam.

**Table S1.** Comparison of foam porosity

| Sample     | Porosity (%) |
|------------|--------------|
| BLPP foam  | 98.3         |
| SBPP foam  | 98.6         |
| SLPP foam  | 99           |
| SBLPP foam | 99.25        |

**Table S2. Comparison of the sensing performance of SBLPP sensor with previously reported pressure sensors.**

| Pressure sensor       | Sensitivity (kPa <sup>-1</sup> ) | Sensing range (kPa) | Reference        |
|-----------------------|----------------------------------|---------------------|------------------|
| <b>SBLPP</b>          | <b>171.23</b>                    | <b>3.5</b>          | <b>This work</b> |
| PEDOT:PSS/PDMS        | 85                               | 10                  | [1]              |
| PEDOT:PSS/CNF         | 5                                | 1                   | [2]              |
| AgNW/PEDOT:PSS/PI     | 31                               | 2.75                | [3]              |
| PEDOT:PSS/CNT@melamin | 3.35                             | 100                 | [4]              |
| e                     |                                  |                     |                  |
| PDMS@MWCNTS/PP        | 16.6                             | 35                  | [5]              |
| PEDOT/PSS/CNF         | 0.015                            | 97                  | [6]              |
| PEDOT:PSS/NFC         | 190                              | 0.3                 | [7]              |

|                         |       |     |      |
|-------------------------|-------|-----|------|
| CNT/PEDOT:PSS/NFC       | 4.48  | 4   | [8]  |
| PEDOT:PSS/CNT           | 1.97  | 100 | [9]  |
| PEDOT:PSS/CNT           | 25.7  | 20  | [10] |
| MXene/PEDOT:PSS         | 26.65 | 11  | [11] |
| PEDOT:PSS/PI            | 5.4   | 16  | [12] |
| SEBS/PEDOT:PSS/melamine | 6.4   | 30  | [13] |

PDMS: polydimethylsiloxane; PEDOT:PSS: poly (3,4-ethylenedioxythiophene):poly (styrenesulfonate); CNT: Carbon nanotube; MWCNT: multi-walled carbon nanotube; CNF: Cellulose nanofibers; PI: polyimide; NFC: carboxymethylated.

**Table S3 Properties of PEDOT:PSS foams prepared by different processes**

| Structure   | Method        | Matrix          | Filler | Conductivity<br>(S/m) | Density<br>(mg/cm <sup>3</sup> ) | Porosity<br>(%) | Max<br>Stress<br>(kPa) | Seebeck<br>factor<br>( $\mu$ V/k) | Ref.        |
|-------------|---------------|-----------------|--------|-----------------------|----------------------------------|-----------------|------------------------|-----------------------------------|-------------|
| <b>Foam</b> | <b>SA+DFD</b> | <b>PEDOT:PS</b> | -      | <b>0.06</b>           | <b>7.2</b>                       | <b>99.25</b>    | <b>1.68</b>            | <b>18.7</b>                       | <b>This</b> |
|             |               | <b>S</b>        |        |                       |                                  |                 |                        |                                   | <b>work</b> |
|             | SCD           | PEDOT:PSS       | -      | 0.1                   | 138                              | 98.87           | /                      | /                                 | [14]        |
|             | SCD           | PEDOT:PSS       | -      | 235                   | 33.6                             | 97.5            | /                      | 13                                | [15]        |
|             | SCD           | PEDOT:PSS       | MWCNTs | 2.5                   | 54                               | 94.5            | /                      | /                                 | [16]        |

|     |           |        |                       |       |      |      |    |      |
|-----|-----------|--------|-----------------------|-------|------|------|----|------|
| DFD | PEDOT:PSS | PI     | 3.5                   | /     | /    | 1.85 | /  | [3]  |
| FD  | PEDOT:PSS | CNF    | 2.12*10 <sup>-4</sup> | 18    | /    | 14   | /  | [2]  |
| DFD | PEDOT:PSS | PDMS   | 0.04                  | /     | 0    | 100  | /  | [17] |
| FD  | PEDOT:PSS | -      | 0.001                 | 1225  | 89.2 | /    | /  | [18] |
| DFD | PEDOT:PSS | -      | 0.11                  | /     | 95   | 3.18 | /  | [1]  |
| FD  | PEDOT:PSS | -      | 3                     | /     | /    | /    | 10 | [19] |
| FD  | PEDOT:PSS | -      | 2.2                   | /     | /    | /    | /  | [20] |
| FD  | PEDOT:PSS | MWCNTs | 571                   | 121.5 | 80   | /    | /  | [21] |
| FD  | PEDOT:PSS | PDMS   | 6                     | /     | 0    | 1.2  | /  | [22] |
| FD  | PEDOT:PSS | NFC    | 500                   | 10.8  | /    | /    | 20 | [23] |

SA: self-assembly; SCD: supercritical CO<sub>2</sub> drying; DFD: Directional freeze drying; FD: Freeze drying; PI: polyimide; CNF: Cellulose nanofibers; NFC: carboxymethylated; PDMS: polydimethylsiloxane; /: Does not have this functionality or not tested.

## Reference

- [1] M. Solazzo and M. G. Monaghan, *Biomater. Sci*, 2021, 9, 4317.
- [2] Y. Wu, Z. Yan, T. Wang, J. Wang, T. Wang, Z. Hu, Y. Ao, Y. Wang and M. Li, *ACS Appl. Polym. Mater*, 2023, 5, 3938-3948.
- [3] J. Wang, X. Yue, X. Li, J. Dong, Q. Zhang and X. Zhao, *ACS Appl. Polym. Mater*,



2022, 4, 3205-3216.

- [4] X. Gao, F. Gao, J. Liu, Y. Li, P. Wan, Z. Yu and X. Li, *ACS Appl. Polym. Mater.*, 2022, 14, 43783-43791.
- [5] H. Li, R. Luo, J. Hu, K. Yang, B. Du, S. Zhou and X. Zhou, *J. Mater. Sci. Technol.*, 2024, 182, 22-32.
- [6] J. Zhou and Y. L. Heish. *ACS Appl. Mater. Interfaces*, 2018,10, 27902-27910.
- [7] S. Han, N. U. H. Alvi, L. Granl f, H. Granberg, M. Berggren, S. Fabiano and X. Crispin, *Adv. Sci.* 2019, 6, 1802128.
- [8] F. Gao, P. Min, Q. Ma, T. Zhang, Z. Yu, J. Shang, R. Li and X. Li, *Adv. Funct. Mater.*, 2023, 34, 2309553.
- [9] F. Gao, P. Min, X. Gao, C. Li, T. Zhang, Z. Yu and X. Li, *J. Mater. Chem. A*, 2022, 10, 18256.
- [10] J. Liu, J. Garcia, L. M. Leahy, R. Song, D. Mullarkey, B. Fei, A. Dervan, I. V. Shvets, P. Stamenov, W. Wang, F. J. O'Brien, J. N. Coleman and V. Nicolosi, *Adv. Funct. Mater.*, 2023, 33, 2214196.
- [11] S. Zhang, T. Tu, T. Li, Y. Cai, Z. Wang, Y. Zhou, D. Wang, L. Fang, X. Ye and B. Liang, *ACS Appl. Mater. Interfaces*, 2022,14, 23877-23887.
- [12] X. Zhao, W. Wang, Z. Wang, J. Wang, T. Huang, J. Dong and Q. Zhang, *Chem. Eng. J.*, 2022, 395, 125115.
- [13] J. Oh, J. Kim, K. T. Park, K. Jo, L. Lee, H. Kim and J. Son, *Nanoscale*, 2018, 0, 1-10.
- [14] X. Zhang, D. Chang, J. Liu and Y. Luo, *J. Mater. Chem.*, 2010, 20, 5080-5085.
- [15] N. Yanagishima, S. Kanehashi, H. Saito, K. Ogino and T. Shimomura, *Polymer*, 2020, 206, 122912.
- [16] X. Zhang, J. Liu, B. Xu, Y. Su and Y. Luo, *Carbon*, 2011, 49, 1884-1893.
- [17] M. Solazzo, L. Hartzell, C. O'Farrell and M. G. Monaghan, *ACS Appl. Mater. Interfaces*, 2022, 14,19265-19277.
- [18] X. Zhang, C. Li and Y. Luo, *Langmuir*, 2011, 27(5), 1915-1923.
- [19] X. Xin, J. Xu, N. Gao, Z. Xue, W. Zhang, J. Xu and S. Chen, *J Appl Polym Sci*, 2021, 138, e49774.

- [20] J. Zhang, X. Fan, X. Meng, J. Zhou, M. Wang, S. Chen, Y. Gao, Y. Chen, C. W. Bielawski and J. Geng, *ACS Nano*, 2021, 15, 8870-8882.
- [21] C. Chang-Jian, E. Cho, K. Lee, J. Huang, P. Chen, B. Ho and Y. Hsiao, *Compos. Part. B-Eng*, 2018, 136, 46-54.
- [22] A. Novikon, J. Goding, C. Chapman, E. Cuttaz and R. A. Green, *APL. Mater*, 2020, 8, 101105.
- [23] S. Han, F. Jiao, Z. U. Khan, J. Edberg, S. Fabiano and X. Crispin, *Adv. Funct. Mater*, 2017, 1703549.
